# Supplementary material for: The Feasibility of a Text-Messaging Intervention Promoting Physical Activity in Shift Workers: A Process Evaluation
Source: MDPI journal article supplement (doi:10.3390/ijerph20043260), 2023-02-13
Supplement: s1 [file s1]

## The feasibility of a text-messaging intervention promoting physical activity in shift workers: a process evaluation

### Exit online survey

The following survey items addressing the implementation, context and mechanisms of action will be used:

| Process evaluation component | Survey items                                                                                                                                                                                                                                                                                                                  |
|------------------------------|-------------------------------------------------------------------------------------------------------------------------------------------------------------------------------------------------------------------------------------------------------------------------------------------------------------------------------|
| Reach                        | Why did you take part in th program                                                                                                                                                                                                                                                                                           |
| Adoption                     | Overall, how beneficial do you think the program has been to you so far?<br>How would you rate the text messages?<br>How would you rate the <i>SEMA</i> <sup>3</sup> app?<br>How would you rate the discussions with the researcher on the program?<br><br>(Answer with 1=no benefit, 5= neutral &; 10= extremely beneficial) |
| Implementation               | Did the program meet your expectations?<br>Did you experience any barriers to participation in the program?<br>If you answered yes to the last question, please give details about any barriers:<br>Do you have any other comments about the health promotion program? (Maybe positive or negative factors).                  |
| Maintenance                  | I will continue to be physically active even after the program (answer: yes, uncertain, no)<br>Would you recommend this type of program to other shift workers?                                                                                                                                                               |
